# Supplementary material for: FOXO1 downregulation contributes to the oncogenic program of primary mediastinal B-cell lymphoma
Source: PubMed Central journal article supplement (PMC4170625; doi:10.18632/oncotarget.2107), 2014-06-15
Supplement: oncotarget-05-5392-s001.pdf [file oncotarget-05-5392-s001.pdf]

## FOXO1 downregulation contributes to the oncogenic program of primary mediastinal B-cell lymphoma

### Supplementary Information

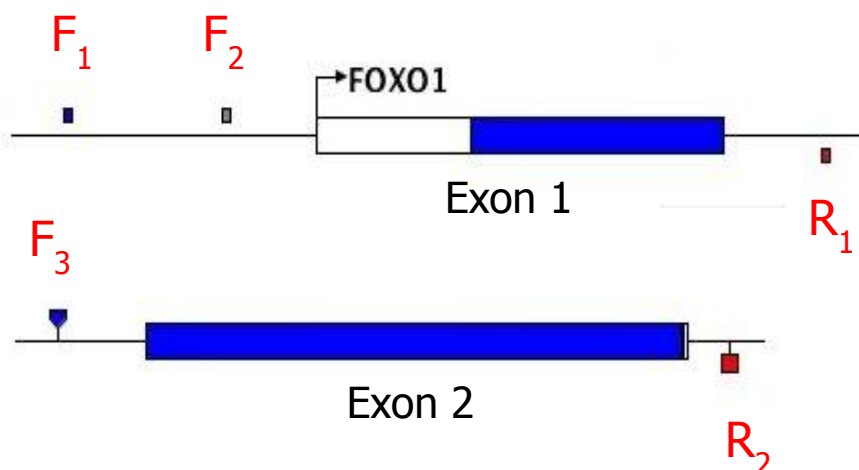

**Figure S1: Structure of *FOXO1* gene and location of sequencing primers.** The sequence of *FOXO1* gene was mined from NCBI database (<http://www.ncbi.nlm.nih.gov/gene/2308>; 12.08.2013) and visualized by using GenePalette software (<http://www.genepalette.org>). The primer sequences were found with help of “Sequencing primer design” on-line utility (Genescript, <http://www.genscript.com>, 13.08.2013). Genomic DNA was isolated from normal B cells and from PMBL cell lines using DNeasy Tissue Kit (Qiagen, Hilden, Germany) and amplified with help of Phusion High-Fidelity DNA polymerase (New England BioLabs). Both forward and reverse primers were used for amplification. Exon 1 was amplified with primers F1: 5’-ATCGCAGCGAAAGAAAACAT-3’ and R1 5’-CTTCTTGGCGCACTTTCTTT-3’ and exon 2 was amplified with primers: F3: 5’-ACCGCACCCAGCCACAGATA -3’ and R2: 5’-GATCCCTCTCTGCAAGGGACAG-3’. The PCR product was purified by agarose gel electrophoresis followed by extraction of the amplified product with help of Gel extraction kit (Qiagen). For sequencing we used the same primers as for amplification with exception of sequencing primer F2: 5’-TGTGTGAAAACACCC-3 because of the long poly A tract located downstream of F1 primer. Long homopolymer stretches of DNA sequence cannot be reliably sequenced because of polymerase shutter. The purified amplification products were sequenced by GATC biotech (Constance, Germany). The sequences were analyzed with help of Lasergene software (DNASTAR).

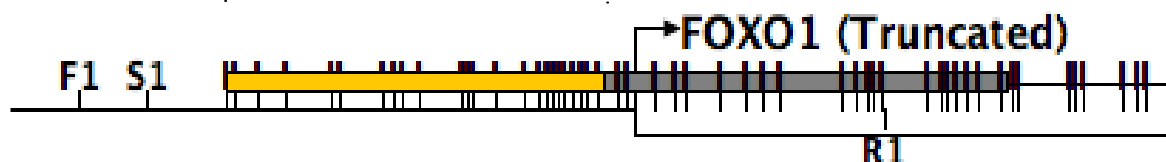

**Figure S2: Methylation status of *FOXO1* promoter CpG island in MedB-1 cell line.**

Structure of FOXO1 promoter. F1 and R1 - forward and reverse amplification primers, respectively; S1 – sequencing primer. CpG dinucleotides are shown as vertical dashes; CpG island is shown as a horizontal bar. The analyzed 26 CpGs are shown in yellow. Methylation status of FOXO1 promoter in tonsillar tissue obtained from different patients, CD19+ tonsillar cells, CD19+/CD10+ germinal center B cells, and MedB-1 cell line was analyzed by pyrosequencing. gDNA was isolated and bisulfite converted with help of EZ DNA Methylation-Direct™ Kit (Fa. Zymo Research). The converted gDNA was amplified by PyroMark PCR Kit (Qiagen). The sequence of primers: F1: 5'-GGA GGT GAG TGT GTG AAA GA-3'; R1: 5'-biotin-AAC CCC TTA CTC TCC CCA AC-3'; S1: 5'-AAT ATT TTA TTA TTT TTT ATT-3'. The sequences of the primers were found with help of PyroMarkAssay Design 2.0 Software (Qiagen). The methylation status of *FOXO1* promoter CpG island was analyzed with help of the PSQ96MA pyrosequencer (Qiagen).

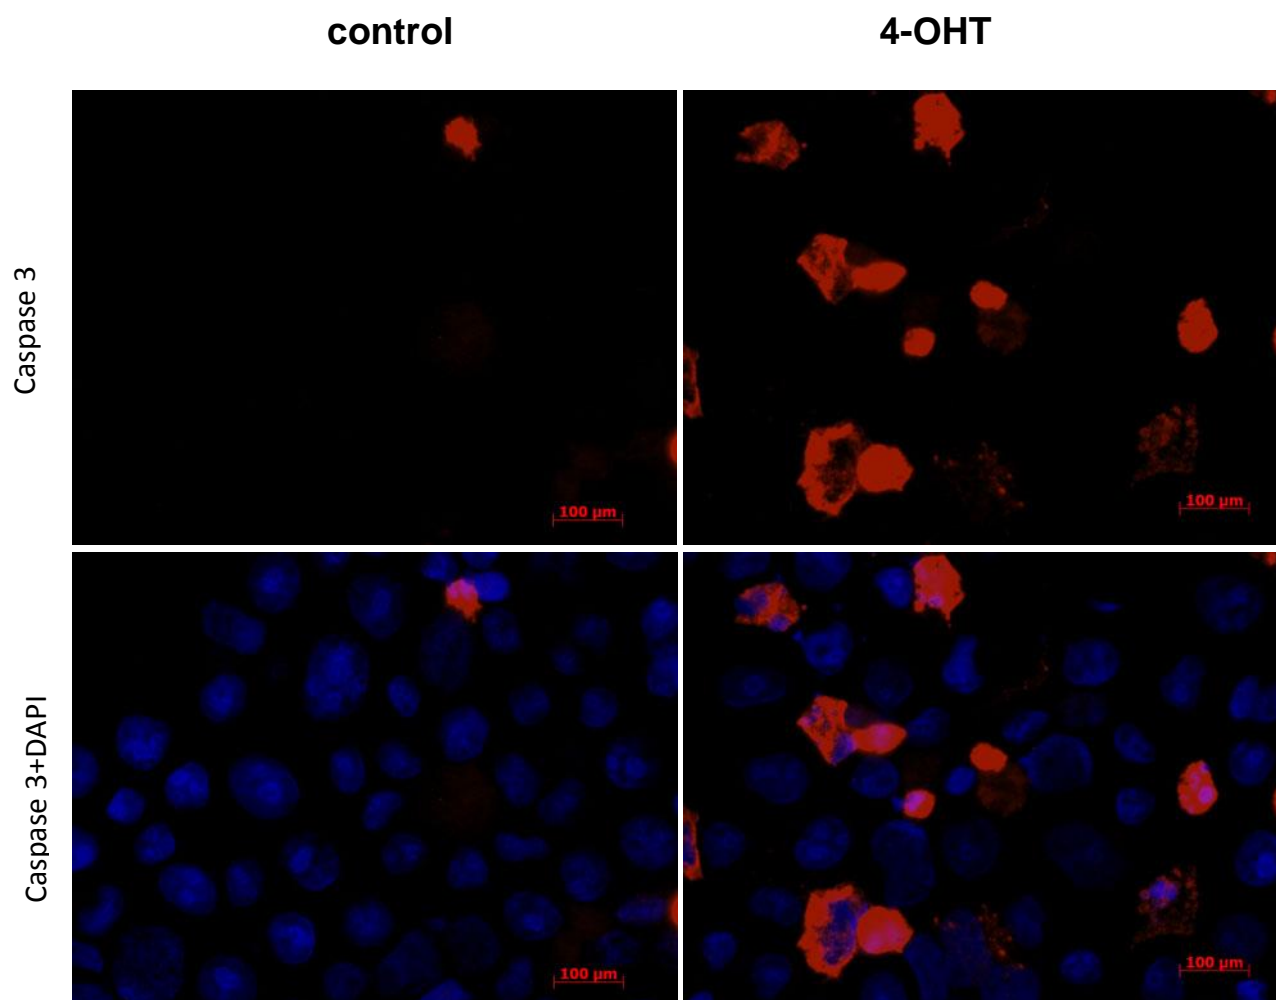

**Figure S3: FOXO1 activates caspase 3 in the PMBL cell line MedB-1.** Cells were treated with 200 nM 4-OHT or with vehicle and were harvested 48h after treatment. Cells were attached to object slides by centrifugation in a cytospin centrifuge, fixed with a mixture of methanol and acetone (1:1) at -20 °C and blocked in filtered 0.1% PBS-skimmed milk for 1 h at room temperature. Then they were incubated with rabbit anti-human cleaved CASP3 antibody (Dako, Hamburg, Germany) followed by donkey anti-rabbit AlexaFluor-594 antibody (Invitrogen, Life Technologies, Darmstadt, Germany) and DAPI (Merck, Darmstadt, Germany). The slides were mounted in Mowiol and images were captured by AxioVert 200 Mimicroscope (Zeiss) equipped with AxioCamMRm camera with help of AxioVision Rel. 4.8 software (Zeiss). Objective: Zeiss Plan APO 63x. CASP3 and DAPI expression are shown as RED and BLUE, respectively.

**Table S1: Aberrant segments affecting *FOXO1* in 5 PMBL cases.**

| ID        | Chromosome | Aberration startpoint (bp) | Aberration endpoint (bp) | Number of markers | Segment mean ratio (log2) |
|-----------|------------|----------------------------|--------------------------|-------------------|---------------------------|
| GSM286982 | 13         | 40701168                   | 43215010                 | 368               | 0.2834                    |
| GSM286986 | 13         | 34884419                   | 48526505                 | 1952              | -0.1443                   |
| GSM286991 | 13         | 31915231                   | 68893868                 | 5025              | 0.2437                    |
| GSM286999 | 13         | 17918051                   | 114125831                | 13359             | 0.3572                    |
| GSM287006 | 13         | 17918051                   | 114125831                | 13359             | 0.2847                    |

Gene expression profiling and CGH data of PMBL cases were mined from GEO database (<http://www.ncbi.nlm.nih.gov/geo/>; GSE 11318; 20.08.2013). Dataset „Molecular subtypes of DLBCL have different chromosomal aberrations“. Copy number aberrations were detected using the R package.

**Table S2: Top 40 genes negatively correlating with *FOXO1* expression in PMBL**

| Other ID     | Gene Title                                                                                       | Gene ID   |
|--------------|--------------------------------------------------------------------------------------------------|-----------|
| 203418_at    | Cyclin A2                                                                                        | CCNA2     |
| 219207_at    | Enhancer of mRNA decapping 3 homolog ( <i>S. cerevisiae</i> )                                    | EDC3      |
| 220800_s_at  | Tropomodulin 3 (ubiquitous)                                                                      | TMOD3     |
| 242977_at    | Hypothetical LOC400796                                                                           | LOC400796 |
| 240700_at    | Transcribed locus, strongly similar to NP_659471.1 torsin A interacting protein 2 [Homo sapiens] | -         |
| 210570_x_at  | Mitogen-activated protein kinase 9                                                               | MAPK9     |
| 207450_s_at  | POU class 6 homeobox 2                                                                           | POU6F2    |
| 228222_at    | Transcribed locus                                                                                | -         |
| 216901_s_at  | IKAROS family zinc finger 1 (Ikeros)                                                             | IKZF1     |
| 1558661_at   | Homo sapiens, clone IMAGE:5539086, mRNA                                                          | -         |
| 203466_at    | MpV17 mitochondrial inner membrane protein                                                       | MPV17     |
| 200693_at    | Tyrosine 3-monooxygenase/tryptophan 5-monooxygenase activation protein, theta polypeptide        | YWHAQ     |
| 225653_at    | Hypothetical LOC644617                                                                           | LOC644617 |
| 211584_s_at  | Nuclear protein, ataxia-telangiectasia locus                                                     | NPAT      |
| 231905_at    | chromosome 20 open reading frame 96                                                              | -         |
| 223177_at    | 5'-nucleotidase domain containing 1                                                              | NT5DC1    |
| 1555785_a_at | 5'-3' exoribonuclease 1                                                                          | XRN1      |
| 218512_at    | WD repeat domain 12                                                                              | WDR12     |
| 209249_s_at  | Growth hormone inducible transmembrane protein                                                   | GHITM     |
| 217307_at    | aconitase 2, mitochondrial                                                                       | -         |

|              |                                                            |         |
|--------------|------------------------------------------------------------|---------|
| 1557360_at   | Transcribed locus                                          | -       |
| 201151_s_at  | Muscleblind-like (Drosophila)                              | MBNL1   |
| 240950_s_at  | Coiled-coil domain containing 155                          | CCDC155 |
| 207381_at    | Arachidonate 12-lipoxygenase, 12R type                     | ALOX12B |
| 209748_at    | Spastin                                                    | SPAST   |
| 1554691_a_at | ADP-ribosylation factor GTPase activating protein 3        | ARFGAP3 |
| 1558922_at   | Full length insert cDNA clone YF43G08                      | -       |
| 1568751_at   | regulator of G-protein signaling 13                        | RGS13   |
| 200793_s_at  | Aconitase 2, mitochondrial                                 | ACO2    |
| 239526_x_at  | Protein tyrosine phosphatase, non-receptor type 1          | PTPN1   |
| 202543_s_at  | Glia maturation factor, beta                               | GMFB    |
| 201263_at    | threonyl-tRNA synthetase                                   | -       |
| 223078_s_at  | Tropomodulin 3 (ubiquitous)                                | TMOD3   |
| 205842_s_at  | Janus kinase 2 (a protein tyrosine kinase)                 | JAK2    |
| 200970_s_at  | Stress-associated endoplasmic reticulum protein 1          | SERP1   |
| 228559_at    | Centromere protein N                                       | CENPN   |
| 234117_at    | Asthma-associated alternatively spliced gene 1             | AAA1    |
| 1560748_at   | Homo sapiens, clone IMAGE:5721950, mRNA                    | -       |
| 220881_at    | Homo sapiens hypothetical protein PRO1787 (PRO1787), mRNA. | -       |
| 1558119_at   | Tetraspanin 17                                             | TSPAN17 |

The data were reanalyzed with help of GeneSifter software to find genes whose expression negatively correlates with *FOXO1*. Normalization: RMA. Analysis type: “Genesifter “Search by gene pattern”. Method: centered. Correlation coefficient: -0.45. FOXO1 probe set 202724\_s\_at was used for this analysis. GEO data set GSE 12453.
